# Supplementary material for: The Ottawa Score Performs Poorly to Identify Cancer Patients at High Risk of Recurrent Venous Thromboembolism: Insights from the TROPIQUE Study and Updated Meta-Analysis
Source: MDPI journal article supplement (doi:10.3390/jcm11133729), 2022-06-28
Supplement: s1 [file s1]

Supplementary material

Figure S1. Six-month cumulative incidence of recurrent venous thromboembolism according to (A) sex, (B) primary tumor site, (C) cancer stage, and (D) previous VTE.

A

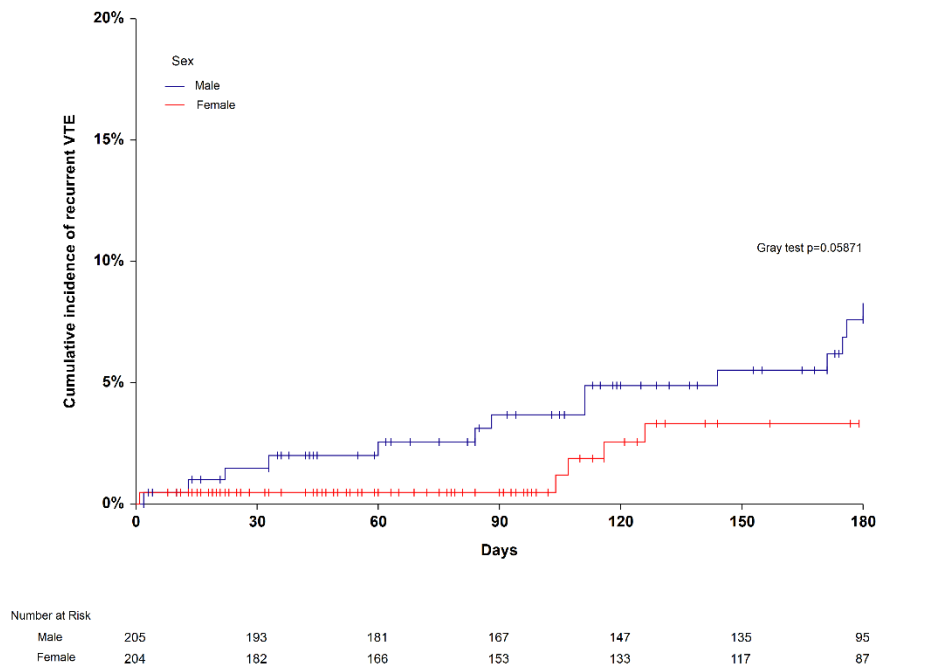

B

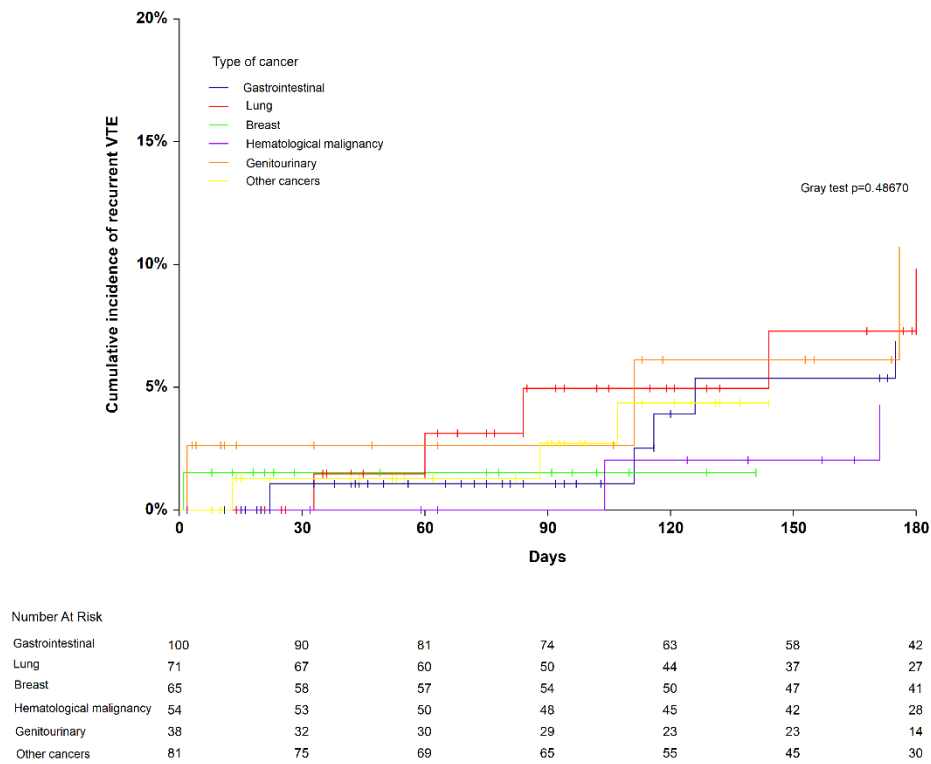

C

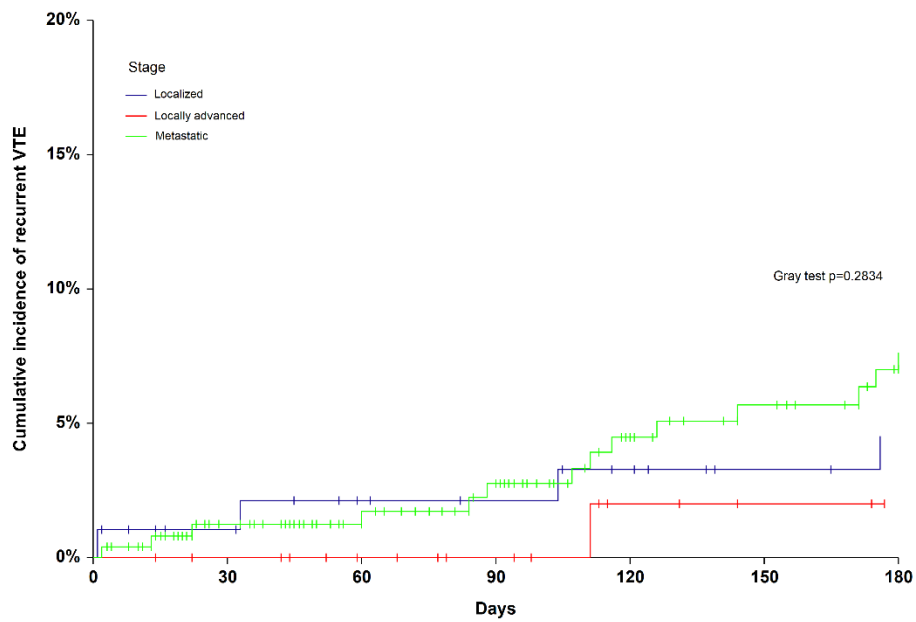

Number at Risk

|                  |     |     |     |     |     |     |     |
|------------------|-----|-----|-----|-----|-----|-----|-----|
| Localized        | 97  | 92  | 87  | 84  | 78  | 69  | 50  |
| Locally advanced | 61  | 59  | 55  | 51  | 46  | 42  | 30  |
| Metastatic       | 251 | 224 | 205 | 185 | 156 | 141 | 102 |

**D**

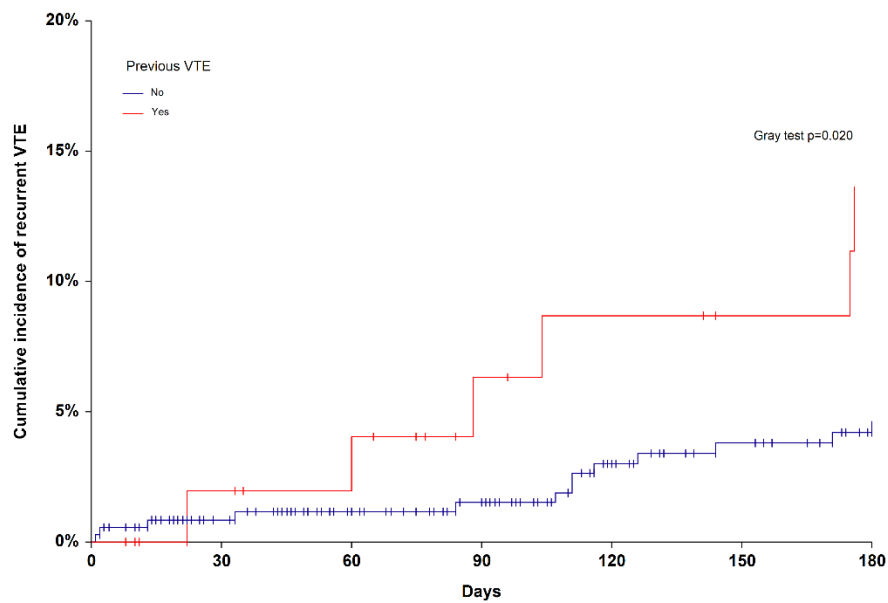

Number at Risk

|                 |     |     |     |     |     |     |     |
|-----------------|-----|-----|-----|-----|-----|-----|-----|
| No previous VTE | 355 | 326 | 300 | 279 | 242 | 217 | 153 |
| Previous VTE    | 54  | 49  | 47  | 41  | 38  | 35  | 29  |

**Table S1.** Six-month cumulative incidence of recurrent venous thromboembolism according to primary tumor site in the prospective TROPIQUE cohort.

| Primary sites    | Number of patients | Six-month cumulative incidence of recurrent VTE (95% CI) |
|------------------|--------------------|----------------------------------------------------------|
| Gastrointestinal | 100                | 6.89% (2.94-16.16)                                       |
| Breast           | 65                 | 1.54% (0.22-10.76)                                       |
| Lung             | 71                 | 9.85% (4.19-23.15)                                       |
| Haematological   | 54                 | 4.28% (1.10-16.66)                                       |
| Genitourinary    | 38                 | 10.70% (3.55-32.24)                                      |
| Other cancers    | 81                 | 4.37% (1.43-13.29)                                       |

Figure S2. PRISMA Flow diagram for systematic review study selection

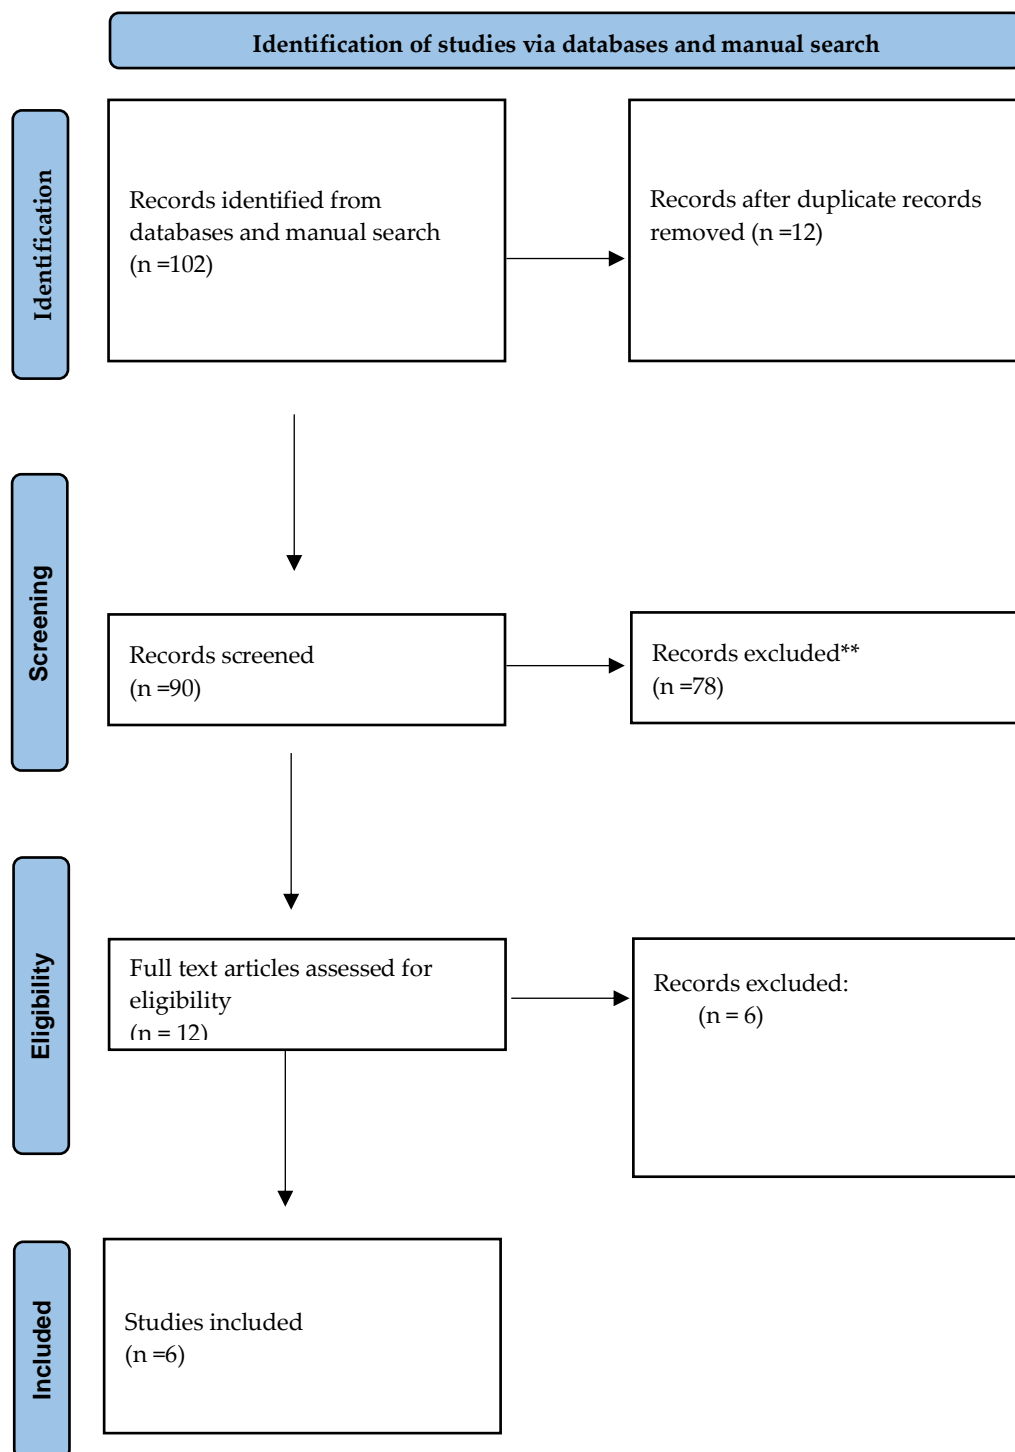

**Table S2.** Characteristics of studies included in the pooled analysis.

| <b>Study</b>                 | <b>Design</b> | <b>Setting</b> | <b>Inclusion period</b> | <b>n</b> | <b>Female sex</b> | <b>Lung cancer</b> | <b>Breast Cancer</b> | <b>Previous VTE</b> | <b>Rates of recurrent VTE</b> |
|------------------------------|---------------|----------------|-------------------------|----------|-------------------|--------------------|----------------------|---------------------|-------------------------------|
| Louzada et al. 2012 [A] [9]  | Retrospective | Single-center  | 2002-2004               | 543      | 55.8%             | 17.7%              | 15.6%                | 8.5%                | 10.1%                         |
| Louzada et al. 2012 [B] [17] | Retrospective | Multicenter    | 2006-2011               | 353      | 57.7%             | 17.5%              | 11%                  | 21.8%               | 12.5%                         |
| Ahn et al. 2012[18]          | Retrospective | Single-center  | 2007-2010               | 546      | 53.8%             | 17.2%              | 6.6%                 | 4.8%                | 18.1%                         |
| Van Es et al 2018[19]        | Prospective   | Multicenter    | 2012-2014               | 117      | 50.4%             | 22.2%              | 8.5%                 | 6.3%                | 9.4%                          |
| Girard et al.2022 [11]       | Prospective   | Multicenter    | 2015-2016               | 409      | 48.7%             | 31.3%              | 13.9%                | 12%                 | 7.0%                          |
| Bosch et al. 2019[12]        | Prospective   | Multicenter    | 2015-2016               | 1046     | 48.3%             | 14.5%              | 11.8%                | 10.7%               | 9.5%                          |
| Frere et al. 2022            | Prospective   | Multicenter    | 2012-2013               | 409      | 49.8%             | 17.4%              | 15.9%                | 13.2%               | 4.6%                          |

**Figure S3.** Pooled recurrence rates of recurrent venous thromboembolism for the original Ottawa score in prospective studies including more than 200 patients. (A) High-risk patients. (B) Low-risk patients.

**A**

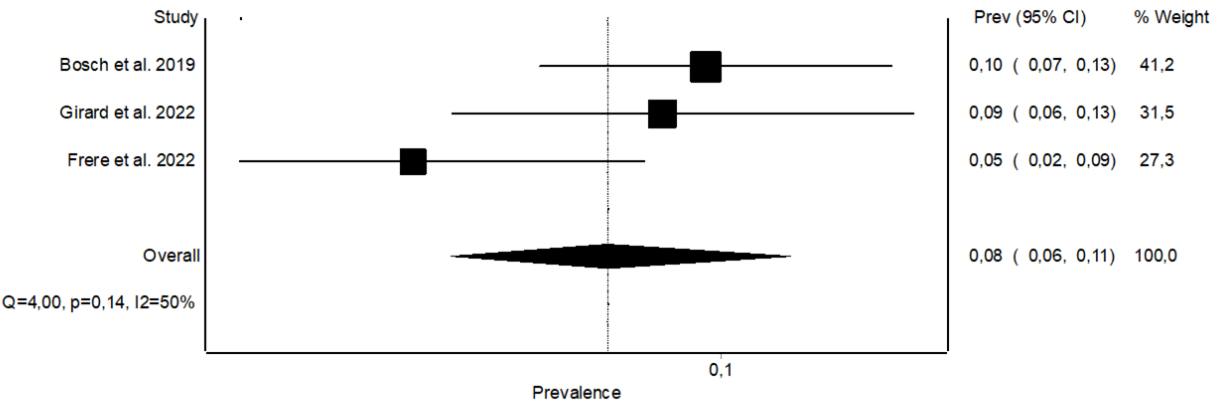

**B**

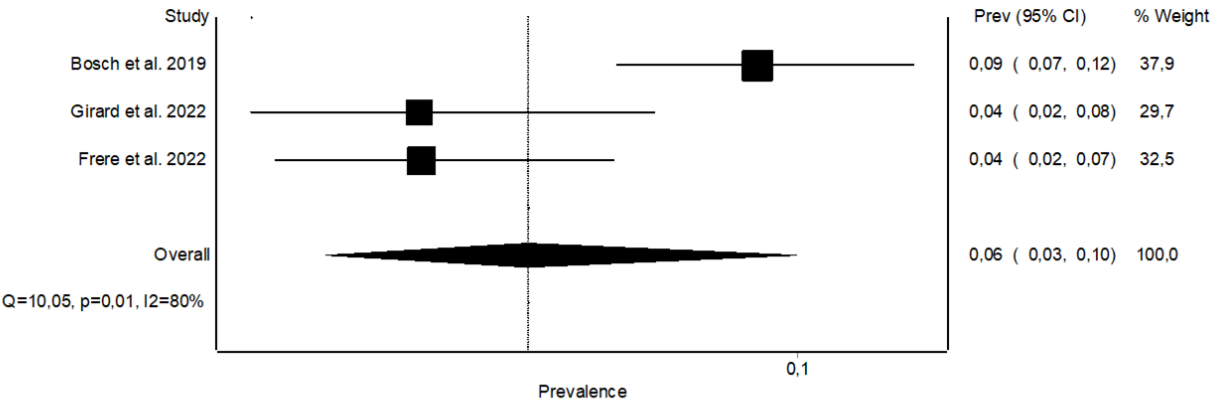

**Table S3.** TRIPOD Checklist: Prediction Model Validation

| Section/Topic                |     | Checklist Item                                                                                                                                                                                        | Page |
|------------------------------|-----|-------------------------------------------------------------------------------------------------------------------------------------------------------------------------------------------------------|------|
| <b>Title and abstract</b>    |     |                                                                                                                                                                                                       |      |
| Title                        | 1   | Identify the study as developing and/or validating a multivariable prediction model, the target population, and the outcome to be predicted.                                                          | 1    |
| Abstract                     | 2   | Provide a summary of objectives, study design, setting, participants, sample size, predictors, outcome, statistical analysis, results, and conclusions.                                               | 1    |
| <b>Introduction</b>          |     |                                                                                                                                                                                                       |      |
| Background and objectives    | 3a  | Explain the medical context (including whether diagnostic or prognostic) and rationale for developing or validating the multivariable prediction model, including references to existing models.      | 1-2  |
|                              | 3b  | Specify the objectives, including whether the study describes the development or validation of the model or both.                                                                                     | 2    |
| <b>Methods</b>               |     |                                                                                                                                                                                                       |      |
| Source of data               | 4a  | Describe the study design or source of data (e.g., randomized trial, cohort, or registry data), separately for the development and validation data sets, if applicable.                               | 2-3  |
|                              | 4b  | Specify the key study dates, including start of accrual; end of accrual; and, if applicable, end of follow-up.                                                                                        | 2-3  |
| Participants                 | 5a  | Specify key elements of the study setting (e.g., primary care, secondary care, general population) including number and location of centres.                                                          | 2-3  |
|                              | 5b  | Describe eligibility criteria for participants.                                                                                                                                                       | 2-3  |
|                              | 5c  | Give details of treatments received, if relevant.                                                                                                                                                     | 2-3  |
| Outcome                      | 6a  | Clearly define the outcome that is predicted by the prediction model, including how and when assessed.                                                                                                | 2-3  |
|                              | 6b  | Report any actions to blind assessment of the outcome to be predicted.                                                                                                                                | 2-3  |
| Predictors                   | 7a  | Clearly define all predictors used in developing or validating the multivariable prediction model, including how and when they were measured.                                                         | 2-3  |
|                              | 7b  | Report any actions to blind assessment of predictors for the outcome and other predictors.                                                                                                            | 2-3  |
| Sample size                  | 8   | Explain how the study size was arrived at.                                                                                                                                                            | 2-3  |
| Missing data                 | 9   | Describe how missing data were handled (e.g., complete-case analysis, single imputation, multiple imputation) with details of any imputation method.                                                  | 2-3  |
| Statistical analysis methods | 10c | For validation, describe how the predictions were calculated.                                                                                                                                         | 2-3  |
|                              | 10d | Specify all measures used to assess model performance and, if relevant, to compare multiple models.                                                                                                   | 2-3  |
|                              | 10e | Describe any model updating (e.g., recalibration) arising from the validation, if done.                                                                                                               | -    |
| Risk groups                  | 11  | Provide details on how risk groups were created, if done.                                                                                                                                             | 2-3  |
| Development vs. validation   | 12  | For validation, identify any differences from the development data in setting, eligibility criteria, outcome, and predictors.                                                                         | 2-3  |
| <b>Results</b>               |     |                                                                                                                                                                                                       |      |
| Participants                 | 13a | Describe the flow of participants through the study, including the number of participants with and without the outcome and, if applicable, a summary of the follow-up time. A diagram may be helpful. | 4    |
|                              | 13b | Describe the characteristics of the participants (basic demographics, clinical features, available predictors), including the number of participants with missing data for predictors and outcome.    | 4    |
|                              | 13c | For validation, show a comparison with the development data of the distribution of important variables (demographics, predictors and outcome).                                                        | 9    |
| Model performance            | 16  | Report performance measures (with CIs) for the prediction model.                                                                                                                                      | 4-8  |
| Model-updating               | 17  | If done, report the results from any model updating (i.e., model specification, model performance).                                                                                                   | -    |
| <b>Discussion</b>            |     |                                                                                                                                                                                                       |      |
| Limitations                  | 18  | Discuss any limitations of the study (such as nonrepresentative sample, few events per predictor, missing data).                                                                                      | 9-10 |
| Interpretation               | 19a | For validation, discuss the results with reference to performance in the development data, and any other validation data.                                                                             | 9-10 |
|                              | 19b | Give an overall interpretation of the results, considering objectives, limitations, results from similar studies, and other relevant evidence.                                                        | 9-10 |
| Implications                 | 20  | Discuss the potential clinical use of the model and implications for future research.                                                                                                                 | 10   |
| <b>Other information</b>     |     |                                                                                                                                                                                                       |      |

|                           |    |                                                                                                                               |          |
|---------------------------|----|-------------------------------------------------------------------------------------------------------------------------------|----------|
| Supplementary information | 21 | Provide information about the availability of supplementary resources, such as study protocol, Web calculator, and data sets. | appendix |
| Funding                   | 22 | Give the source of funding and the role of the funders for the present study.                                                 | 11       |
